# Supplementary material
Source: PubMed Central journal article supplement (PMC10777823)
Supplement: aac.01009-23-s0001.pdf [file aac.01009-23-s0001.pdf]

**Supplemental Table 1. Non-synonymous mutations unique to each isolate.**

Variant calls for all strains were made using PAO1 as the reference strain. Non-synonymous mutations found only in a single strain are reported for each isolate A) BSL5, B) BSL9, and C) BSL15, respectively.

**A) Present in BSL5, but not BSL9 or BSL15**

| POS <sup>a</sup> | REF                | ALT                 | EFFECT                  | NUCLEOTIDE CHANGE <sup>b</sup>                        | AMINO ACID CHANGE             | GENE LOCI <sup>c</sup> |
|------------------|--------------------|---------------------|-------------------------|-------------------------------------------------------|-------------------------------|------------------------|
| 53877            | CTG                | TCT                 | upstream_gene_variant   | c.-4909_-4907delCTGinsTCT                             | -                             | PA0044                 |
| 264708           | A                  | C                   | upstream_gene_variant   | c.-1908A>C                                            | -                             | PA0236                 |
| 283003           | G                  | T                   | missense_variant        | c.551C>A                                              | p.Thr184Asn                   | PA0251                 |
| 283010           | GCCT               | CTTC                | missense_variant        | c.541_544delAGGCinsGAAG                               | p.ArgLeu181GluVal             | PA0251                 |
| 283023           | CTCGAGGTGTTCTTGACG | TTCCAGATGCTTGTTCACT | missense_variant        | c.513_531delCGTCAAGGAACACCTCGAGinsAGTGAACAAGCATCTGGAA | p.AsnValLysGlu171LysValAsnLys | PA0251                 |
| 358851           | T                  | G                   | upstream_gene_variant   | c.-2374A>C                                            | -                             | PA0316                 |
| 795611           | GTGA               | ATCT                | missense_variant        | c.1111_1114delGTGAinsATCT                             | p.ValSer371IleCys             | PA0727                 |
| 999921           | T                  | TTCTA               | upstream_gene_variant   | c.-92_-91insTCTA                                      | -                             | PA0917                 |
| 1013762          | GGCCGTCCGGA        | G                   | frameshift_variant      | c.1981_1990delTCCGGACGGC                              | p.Ser661fs                    | PA0928                 |
| 1335571          | T                  | C                   | upstream_gene_variant   | c.-4188A>G                                            | -                             | PA1229                 |
| 1400468          | G                  | GT                  | frameshift_variant      | c.37dupA                                              | p.Thr13fs                     | PA1288                 |
| 2110105          | CGATGCGG           | TGCCGCGA            | upstream_gene_variant   | c.-601_-594delCCGCATCGinsTCGCGGCA                     | -                             | PA1928                 |
| 2419167          | GC                 | AT                  | missense_variant        | c.445_446delGCinsAT                                   | p.Ala149Met                   | PA2200                 |
| 2419175          | CA                 | TT                  | missense_variant        | c.453_454delCAinsTT                                   | p.Thr152Ser                   | PA2200                 |
| 2464659          | A                  | G                   | missense_variant        | c.664A>G                                              | p.Thr222Ala                   | PA2239                 |
| 2568794          | A                  | G                   | upstream_gene_variant   | c.-510T>C                                             | -                             | PA2326                 |
| 2641547          | CAGCGCG            | TACGGCC             | missense_variant        | c.513_519delCAGCGCGinsTACGGCC                         | p.Ser172Thr                   | PA2388                 |
| 2687979          | CA                 | GG                  | missense_variant        | c.483_484delCAinsGG                                   | p.Ile162Val                   | PA2403                 |
| 2775335          | G                  | T                   | missense_variant        | c.3470C>A                                             | p.Ala1157Asp                  | PA2462                 |
| 2776508          | T                  | G                   | missense_variant        | c.2297A>C                                             | p.Lys766Thr                   | PA2462                 |
| 2897386          | A                  | G                   | upstream_gene_variant   | c.-3558T>C                                            | -                             | PA2559                 |
| 2922557          | A                  | C                   | missense_variant        | c.13T>G                                               | p.Leu5Val                     | PA2583                 |
| 2922563          | C                  | T                   | missense_variant        | c.7G>A                                                | p.Ala3Thr                     | PA2583                 |
| 3642284          | ACGCCG             | GCGCCA              | missense_variant        | c.546_551delCGGCGTinsTGGCGC                           | p.Val184Ala                   | PA3256                 |
| 3889920          | G                  | A                   | upstream_gene_variant   | c.-936C>T                                             | -                             | PA3475                 |
| 3979685          | T                  | TCCAA               | upstream_gene_variant   | c.-175_-174insCCAA                                    | -                             | PA3552                 |
| 4214613          | TCGCCCC            | CCGCCCT             | downstream_gene_variant | c.*925_*931delGGGGCGAinsAGGGCGG                       | -                             | PA3763                 |
| 5071899          | G                  | C                   | upstream_gene_variant   | c.-2368C>G                                            | -                             | PA4525                 |
| 5139031          | CCTCTA             | TCTCTG              | upstream_gene_variant   | c.-282_-277delTAGAGGinsCAGAGA                         | -                             | PA4588                 |
| 5825796          | A                  | G                   | upstream_gene_variant   | c.-339A>G                                             | -                             | PA5174                 |
| 5898737          | ACAAG              | GCAGA               | missense_variant        | c.54_58delCTTGinsTCTGC                                | p.Ser20Pro                    | PA5238                 |
| 6241614          | G                  | A                   | upstream_gene_variant   | c.-3364C>T                                            | -                             | PA5544                 |

<sup>a</sup>Position in reference to *P. aeruginosa* PAO1 chromosome

<sup>b</sup>Numbering indicates nucleotide from start codon, \* indicates number of nucleotides from the end of the stop codon

<sup>c</sup>Gene loci references homologous gene in PAO1 chromosome

**B) Present in BSL9, but not BSL5 or BSL15**

| POS <sup>a</sup> | REF        | ALT        | EFFECT                         | NUCLEOTIDE CHANGE <sup>b</sup>     | AMINO ACID CHANGE         | GENE LOCI <sup>c</sup> |
|------------------|------------|------------|--------------------------------|------------------------------------|---------------------------|------------------------|
| 53982            | GCC        | ACA        | upstream_gene_variant          | c.-4804_-4802delGCCinsACA          | -                         | PA0044                 |
| 353654           | TCTCGGG    | CCTCGGA    | upstream_gene_variant          | c.-4609_-4603delCCCGAGAAinsTCCGAGG | -                         | PA0307                 |
| 1061189          | C          | T          | upstream_gene_variant          | c.-1732C>T                         | -                         | PA0981                 |
| 1267001          | T          | G          | upstream_gene_variant          | c.-3835A>C                         | -                         | PA1163                 |
| 1447192          | G          | GCGCCCCA   | upstream_gene_variant          | c.-2742_-2741insTGGGGCG            | -                         | PA1331                 |
| 2077042          | C          | T          | downstream_gene_variant        | c.*4104C>T                         | -                         | PA1901                 |
| 2558822          | TGC        | CGCG       | upstream_gene_variant          | c.-4974_-4972delGCAinsCGCG         | -                         | PA2315                 |
| 2568823          | AC         | GT         | upstream_gene_variant          | c.-540_-539delGTinsAC              | -                         | PA2326                 |
| 2632977          | C          | CGCGCAG    | conservative_inframe_insertion | c.217_222dupCTGCGC                 | p.Arg74_Val75insLeuArg    | PA2380                 |
| 2639068          | T          | A          | missense_variant               | c.1192A>T                          | p.Ser398Cys               | PA2386                 |
| 2688442          | A          | G          | missense_variant               | c.946A>G                           | p.Ser316Gly               | PA2403                 |
| 2704358          | G          | GA         | upstream_gene_variant          | c.-3254_-3253insT                  | -                         | PA2417                 |
| 2704370          | TC         | CT         | upstream_gene_variant          | c.-3266_-3265delGAinsAG            | -                         | PA2417                 |
| 2760310          | C          | T          | upstream_gene_variant          | c.-223G>A                          | -                         | PA2459                 |
| 3043419          | A          | G          | upstream_gene_variant          | c.-3002A>G                         | -                         | PA2692                 |
| 3136982          | T          | C          | upstream_gene_variant          | c.-4952A>G                         | -                         | PA2773                 |
| 3528364          | T          | C          | upstream_gene_variant          | c.-1686A>G                         | -                         | PA3141                 |
| 3528373          | A          | G          | upstream_gene_variant          | c.-1695T>C                         | -                         | PA3141                 |
| 4008781          | C          | T          | upstream_gene_variant          | c.-4025C>T                         | -                         | PA3581                 |
| 4008790          | T          | C          | upstream_gene_variant          | c.-4016T>C                         | -                         | PA3581                 |
| 4304575          | GCCGTTTTTT | ACCGTTTTTC | upstream_gene_variant          | c.-82_-73delAAAAACGGCinsGAAAAACGGT | -                         | PA3841                 |
| 4305503          | AGGCCT     | GGGCCG     | upstream_gene_variant          | c.-1006_-1001delAGGCCTinsCGGCC     | -                         | PA3841                 |
| 4725273          | C          | T          | stop_gained                    | c.1529G>A                          | p.Trp510*                 | PA4221                 |
| 4831147          | GAA        | ACC        | missense_variant               | c.184_186delGAAinsACC              | p.Glu62Thr                | PA4306                 |
| 4831229          | A          | G          | upstream_gene_variant          | c.-4041T>C                         | -                         | PA4302                 |
| 4831248          | GTAA       | ATGC       | upstream_gene_variant          | c.-4063_-4060delTTACinsGCAT        | -                         | PA4302                 |
| 5050710          | G          | GACGCCA    | upstream_gene_variant          | c.-4047_-4046insTGGCGT             | -                         | PA4507                 |
| 5189697          | T          | C          | missense_variant               | c.3179A>G                          | p.Asn1060Ser              | PA4625                 |
| 5446395          | G          | GCGGCCACCT | conservative_inframe_insertion | c.217_218insCGGCCACCT              | p.Ala73_Ala74insAlaThrSer | PA4851                 |
| 5727408          | T          | C          | missense_variant               | c.2069A>G                          | p.Glu690Gly               | PA5089                 |
| 5994736          | CTCCA      | TCCC       | upstream_gene_variant          | c.-1300_-1296delCTCCAinsTCCC       | -                         | PA5325                 |
| 6188000          | A          | G          | upstream_gene_variant          | c.-1475T>C                         | -                         | PA5493                 |

<sup>a</sup>Position in reference to *P. aeruginosa* PAO1 chromosome

<sup>b</sup>Numbering indicates nucleotide from start codon, \* indicates number of nucleotides from the end of the stop codon

<sup>c</sup>Gene loci references homologous gene in PAO1 chromosome

C) Present in BSL15, but not BSL5 or BSL9

| POS <sup>a</sup> | REF       | ALT      | EFFECT                         | NUCLEOTIDE CHANGE <sup>b</sup>                    | AMINO ACID CHANGE                                 | GENE LOCI <sup>c</sup> |
|------------------|-----------|----------|--------------------------------|---------------------------------------------------|---------------------------------------------------|------------------------|
| 184126           | CTCGGAC   | TTCGGAG  | upstream_gene_variant          | c.-468_-462delCTCGGACinsTTCGGAG                   | -                                                 | PA0162                 |
| 321949           | CCTGG     | TGA      | upstream_gene_variant          | c.-4164_-4160delCCAGGinsTCA                       | -                                                 | PA0283                 |
| 473432           | A         | C        | missense_variant               | c.242A>C                                          | p.Glu81Ala                                        | PA0426                 |
| 750530           | C         | G        | missense_variant               | c.574C>G                                          | p.Leu192Val                                       | PA0690                 |
| 750652           | GG        | CA       | missense_variant               | c.696_697delGGinsCA                               | p.Asp233Asn                                       | PA0690                 |
| 994768           | C         | CAGGCTGC | conservative_inframe_insertion | c.70_71insAGGCTGCCGGGAGTGTCTGTCGAGACGGGGCAAG      | p.Gln24_Ala25insAlaAlaGlySerValValGluThrGlyGlnGlu | PA0911                 |
| 1243402          | A         | C        | upstream_gene_variant          | c.-902T>G                                         | -                                                 | PA1148                 |
| 1527020          | GTTCGGGGC | G        | upstream_gene_variant          | c.-2204_-2190delGTGGGGTCCCCCGAA                   | -                                                 | PA1401                 |
| 1566317          | CG        | TT       | missense_variant               | c.2351_2352delCGinsTT                             | p.Ser784Phe                                       | PA1436                 |
| 2216029          | CCTACCT   | TCTACCC  | upstream_gene_variant          | c.-659_-653delCCTACCTinsTCTACCC                   | -                                                 | PA2025                 |
| 2262929          | C         | T        | missense_variant               | c.154G>A                                          | p.Ala52Thr                                        | PA2064                 |
| 2263733          | GC        | AT       | missense_variant               | c.1244_1245delGCinsAT                             | p.Ser415Asn                                       | PA2065                 |
| 2486179          | T         | G        | upstream_gene_variant          | c.-1677T>G                                        | -                                                 | PA2259                 |
| 2568691          | A         | G        | upstream_gene_variant          | c.-407T>C                                         | -                                                 | PA2326                 |
| 2640875          | G         | A        | upstream_gene_variant          | c.-2070C>T                                        | -                                                 | PA2385                 |
| 2647470          | AAC       | CAG      | missense_variant               | c.939_941delGTTinsCTG                             | p.Phe314Cys                                       | PA2392                 |
| 2685507          | C         | T        | missense_variant               | c.1672G>A                                         | p.Val558Ile                                       | PA2402                 |
| 2761459          | C         | T        | upstream_gene_variant          | c.-1372G>A                                        | -                                                 | PA2459                 |
| 3099269          | CCCAA     | TCCAG    | upstream_gene_variant          | c.-3221_-3217delTTGGGinsCTGGA                     | -                                                 | PA2734                 |
| 3099280          | TA        | CT       | upstream_gene_variant          | c.-3229_-3228delTAinsAG                           | -                                                 | PA2734                 |
| 3596196          | GCGCCTGC  | G        | conservative_inframe_deletion  | c.256_294delCGCTGTGTCAGCGCACCTACCTGCCGCGCCCCACCAC | p.Arg86_His98del                                  | PA3206                 |
| 3605482          | TGGCC     | CGGCCG   | upstream_gene_variant          | c.-202_-198delTGGCCinsCGGCCG                      | -                                                 | PA3217                 |
| 3686843          | G         | T        | missense_variant               | c.1808C>A                                         | p.Thr603Lys                                       | PA3294                 |
| 3773983          | CGG       | GGT      | upstream_gene_variant          | c.-2505_-2503delCCGinsACC                         | -                                                 | PA3359                 |
| 3808278          | C         | CCGGCGCC | upstream_gene_variant          | c.-4936_-4935insCCGGCGCGCCG                       | -                                                 | PA3397                 |
| 4133900          | T         | C        | upstream_gene_variant          | c.-3508A>G                                        | -                                                 | PA3687                 |
| 4305586          | A         | G        | upstream_gene_variant          | c.-1084T>C                                        | -                                                 | PA3841                 |
| 4305591          | G         | T        | upstream_gene_variant          | c.-1089C>A                                        | -                                                 | PA3841                 |
| 4407702          | TCCGG     | CCCGGT   | upstream_gene_variant          | c.-2808_-2804delCCGGinsACCGGG                     | -                                                 | PA3929                 |
| 4476328          | A         | G        | missense_variant               | c.374A>G                                          | p.His125Arg                                       | PA3995                 |
| 4591101          | GTGC      | CTGA     | upstream_gene_variant          | c.-2928_-2925delGTGCinsCTGA                       | -                                                 | PA4110                 |
| 4699809          | C         | CGTCGAGC | upstream_gene_variant          | c.-3775_-3774insAACGCTCGAC                        | -                                                 | PA4197                 |
| 4732282          | G         | T        | missense_variant               | c.4517C>A                                         | p.Pro1506Gln                                      | PA4225                 |
| 4925171          | GCGACGTT  | CCGACGTT | upstream_gene_variant          | c.-1865_-1857delGCGACGTTTinsCCGACGTTT             | -                                                 | PA4397                 |
| 5361311          | G         | A        | upstream_gene_variant          | c.-2760G>A                                        | -                                                 | PA4776                 |
| 5471532          | T         | C        | upstream_gene_variant          | c.-1292T>C                                        | -                                                 | PA4876                 |
| 5471545          | A         | G        | upstream_gene_variant          | c.-1279A>G                                        | -                                                 | PA4876                 |
| 5726546          | AGTC      | GGCT     | missense_variant               | c.690_693delGACTinsAGCC                           | p.Thr231Ala                                       | PA5088                 |
| 5944026          | CA        | C        | frameshift_variant             | c.422delA                                         | p.His141fs                                        | PA5279                 |
| 6187938          | C         | T        | upstream_gene_variant          | c.-1413G>A                                        | -                                                 | PA5493                 |
| 6187946          | CGGA      | TGG      | upstream_gene_variant          | c.-1424_-1421delTCCGinsCCA                        | -                                                 | PA5493                 |

<sup>a</sup>Position in reference to *P. aeruginosa* PAO1 chromosome

<sup>b</sup>Numbering indicates nucleotide from start codon

<sup>c</sup>Gene loci references homologous gene in PAO1 chromosome
