# Supplementary material
Source: PubMed Central journal article supplement (PMC10777823)
Supplement: aac.01009-23-s0002.pdf [file aac.01009-23-s0002.pdf]

**Supplemental Table 2. Non-synonymous mutations in resistance associated genes shared across isolates BSL 5, BSL 9, and BSL 15.**

| Locus Tag <sup>a</sup>           | Gene          | Nucleotide change(s)                                                                                                                                                                                           | Amino Acid change(s)                                                                                                  |
|----------------------------------|---------------|----------------------------------------------------------------------------------------------------------------------------------------------------------------------------------------------------------------|-----------------------------------------------------------------------------------------------------------------------|
| <b>AmpC (PDC) and regulators</b> |               |                                                                                                                                                                                                                |                                                                                                                       |
| PA4110 <sup>b</sup>              | <i>ampC</i>   | c.80_81delGCinsAT; c.290C>T; c.313A>G; c.613G>C; c.1172G>C                                                                                                                                                     | p.Gly1Asp; p.Ala71Val; p.Thr79Ala; p.Val179Leu; p.Gly365Ala                                                           |
| PA4109                           | <i>ampR</i>   | c.844_848delCGGGGinsAGGGA; c.863T>G                                                                                                                                                                            | p.Gly283Glu; p.Met288Arg                                                                                              |
| PA4522                           | <i>ampD</i>   | c.443G>C; c.117_131delCCTGCCGCCGGGACinsTCT                                                                                                                                                                     | p.Gly148Ala; p.Pro41_Gln44del                                                                                         |
| PA5485                           | <i>ampDh2</i> | -                                                                                                                                                                                                              | -                                                                                                                     |
| PA0807                           | <i>ampDh3</i> | -                                                                                                                                                                                                              | -                                                                                                                     |
| PA4393                           | <i>ampG</i>   | c.1747G>A                                                                                                                                                                                                      | p.Ala583Thr                                                                                                           |
| PA3047                           | <i>dacB</i>   | -                                                                                                                                                                                                              | -                                                                                                                     |
| PA3999                           | <i>dacC</i>   | -                                                                                                                                                                                                              | -                                                                                                                     |
| PA4003                           | <i>pbpA</i>   | -                                                                                                                                                                                                              | -                                                                                                                     |
| PA4020                           | <i>mpl</i>    | -                                                                                                                                                                                                              | -                                                                                                                     |
| PA4418                           | <i>ftsI</i>   | -                                                                                                                                                                                                              | -                                                                                                                     |
| <b>Porin</b>                     |               |                                                                                                                                                                                                                |                                                                                                                       |
| PA0958                           | <i>oprD</i>   | c.1274G>C; c.944_951delCAGGTGGCinsGCGGGCGGT;<br>c.928_930delCGCinsGAG; c.565_570delGTCAAinsACCAAG;<br>c.553_558delGAGCCGinsCAGGGC; c.508T>C;<br>c.344_354delAGCCGCGGATinsCGCCCGTGAC; c.308_312delCCGGCinsGCGGT | p.Gly425Ala; p.Ala315Gly;<br>p.Arg310Glu; p.Val189Thr;<br>p.GluPro185GlnGly; p.Phe170Leu;<br>p.Lys115Thr; p.Thr103Ser |
| <b>Quinolone</b>                 |               |                                                                                                                                                                                                                |                                                                                                                       |
| PA3168                           | <i>gyrA</i>   | c.248C>T                                                                                                                                                                                                       | p.Thr83Ile                                                                                                            |
| PA0004                           | <i>gyrB</i>   | -                                                                                                                                                                                                              | -                                                                                                                     |
| PA4964                           | <i>parC</i>   | -                                                                                                                                                                                                              | -                                                                                                                     |
| PA4967                           | <i>parE</i>   | -                                                                                                                                                                                                              | -                                                                                                                     |
| <b>Efflux</b>                    |               |                                                                                                                                                                                                                |                                                                                                                       |
| PA0424                           | <i>mexR</i>   | c.272G>A; c.377T>A                                                                                                                                                                                             | p.Arg91His; p.Val126Glu                                                                                               |
| PA0425                           | <i>mexA</i>   | none                                                                                                                                                                                                           | none                                                                                                                  |
| PA0426                           | <i>mexB</i>   | c.2870G>A; c.3120_3125delGTCCGTinsTGAGGC                                                                                                                                                                       | p.Gly957Asp; p.SerVal1041GluAla                                                                                       |
| PA0427                           | <i>oprM</i>   | -                                                                                                                                                                                                              | -                                                                                                                     |
| PA1798                           | <i>parS</i>   | c.1193A>G                                                                                                                                                                                                      | p.His398Arg                                                                                                           |
| PA1799                           | <i>parR</i>   | c.458T>G; c.509G>A                                                                                                                                                                                             | p.Leu153Arg; p.Ser170Asn                                                                                              |
| PA2018                           | <i>mexY</i>   | c.1627A>G                                                                                                                                                                                                      | p.Thr543Ala                                                                                                           |
| PA2019                           | <i>mexX</i>   | c.88G>A; c.985A>C; c.991T>G; c.1072T>C                                                                                                                                                                         | p.Ala30Thr; p.Lys329Gln; p.Leu331Val; p.Trp358Arg                                                                     |
| PA2020                           | <i>mexZ</i>   | -                                                                                                                                                                                                              | -                                                                                                                     |
| PA2491                           | <i>mexS</i>   | c.745G>A                                                                                                                                                                                                       | p.Asp249Asn                                                                                                           |
| PA2492                           | <i>mexT</i>   | c.178C>T; c.240_247delGCCGGCCA; c.514T>A                                                                                                                                                                       | p.Pro60Ser; reversion of 8-bp insertion present in PAO1; p.Phe172Ile                                                  |
| PA2493                           | <i>mexE</i>   | c.5A>T; c.23C>T; c.1103A>G                                                                                                                                                                                     | p.Glu2Val; p.Ser8Phe; p.Gln368Arg                                                                                     |
| PA2494                           | <i>mexF</i>   | c.145G>A                                                                                                                                                                                                       | p.Ala49Thr                                                                                                            |
| PA2495                           | <i>oprN</i>   | c.37T>C                                                                                                                                                                                                        | p.Ser13Pro                                                                                                            |
| PA3574                           | <i>nalD</i>   | -                                                                                                                                                                                                              | -                                                                                                                     |
| PA3721                           | <i>nalC</i>   | c.212G>A; c.457G>C; c.625A>C                                                                                                                                                                                   | p.Gly71Glu; p.Glu153Gln; p.Ser209Arg                                                                                  |
| PA4597                           | <i>oprJ</i>   | c.205A>G; c.800A>G                                                                                                                                                                                             | p.Met69Val; p.Gln267Arg                                                                                               |
| PA4598                           | <i>mexD</i>   | c.2533T>G; c.2944A>G                                                                                                                                                                                           | p.Ser845Ala; p.Ile982Val                                                                                              |
| PA4599                           | <i>mexC</i>   | c.92C>T; c.227G>A; c.929A>G; c.988T>G; c.1147C>T                                                                                                                                                               | p.Ala31Val; p.Arg76Gln; p.His310Arg; p.Ser330Ala; p.Pro383Ser                                                         |
| PA4600                           | <i>nfxB</i>   | -                                                                                                                                                                                                              | -                                                                                                                     |
| PA4776                           | <i>pmrA</i>   | c.212T>G                                                                                                                                                                                                       | p.Leu71Arg                                                                                                            |
| PA4777                           | <i>pmrB</i>   | c.4_10delTCCCGTGinsCCGCGTA; c.202G>A; c.1033T>C; c.1084G>A                                                                                                                                                     | p.SerArgAla2ProArgThr; p.Gly68Ser; p.Tyr345His; p.Gly362Ser                                                           |
| PA5471                           | <i>armZ</i>   | c.263T>C; c.482_483delATinsGC; c.546T>G; c.610C>T; c.728T>C                                                                                                                                                    | p.Leu88Pro; p.Asp161Gly; p.His182Gln; p.Arg204Cys; p.Val243Ala                                                        |
| <b>TonB Pathway</b>              |               |                                                                                                                                                                                                                |                                                                                                                       |
| PA4514                           | <i>piuA</i>   | c.102G>C                                                                                                                                                                                                       | p.Gln34His                                                                                                            |
| PA4515                           | <i>piuC</i>   | c.602G>A                                                                                                                                                                                                       | p.Arg201His                                                                                                           |
| PA0931                           | <i>pirA</i>   | c.59G>A; c.704C>T; c.1108G>A                                                                                                                                                                                   | p.Ser20Asn; p.Thr235Ile; p.Ala370Thr                                                                                  |
| PA0929                           | <i>pirR</i>   | c.155G>C                                                                                                                                                                                                       | p.Gly52Ala                                                                                                            |
| PA0930                           | <i>pirS</i>   | c.230G>A; c.377G>A; c.538A>G; c.983C>A                                                                                                                                                                         | p.Arg77Gln; p.Ser126Asn; p.Ile180Val; p.Ala328Asp                                                                     |

<sup>a</sup>Locus tag corresponds to reference PA01 genome.

<sup>b</sup>Numbering of peptide after removal of the 26 amino acid signal peptide.  
del, deletion; ins, insertion; PDC, Pseudomonas derived cephalosporinase
