# Supplementary material
Source: PubMed Central journal article supplement (PMC10777823)
Supplement: aac.01009-23-s0003.pdf [file aac.01009-23-s0003.pdf]

**Supplemental Table 3.** Modified carbapenem inactivation method using cefiderocol disks.<sup>a</sup>

| <b>Isolate</b>                | <b>TSB alone</b> | <b>TSB + EDTA</b> | <b>IDMH alone</b> | <b>IDMH + EDTA</b> |
|-------------------------------|------------------|-------------------|-------------------|--------------------|
| No isolate added to broth     | 25               | 25                | 25                | 27                 |
| PA01                          | 26               | 25                | 22                | 25                 |
| Positive control <sup>b</sup> | 19               | 27                | 20                | 30                 |
| BSL-9                         | 25               | 26                | 25                | 25                 |
| BSL-15                        | 23               | 25                | 25                | 26                 |

<sup>a</sup>All disk diameters are reported in millimeters.

<sup>b</sup>*P. aeruginosa* ST773 isolate producing NDM-1, VIM-5, and OXA-21
